## **Correction: Notch-Deficient Skin Induces a Lethal Systemic B-Lymphoproliferative Disorder by Secreting TSLP, a Sentinel for Epidermal Integrity**

Shadmehr Demehri, Zhenyi Liu, Jonghyeob Lee, Meei-Hua Lin, Seth D. Crosby, Christopher J. Roberts, Perry W. Grigsby, Jeffrey H. Miner, Andrew G. Farr, Raphael Kopan

Correction for:

Demehri S, Liu Z, Lee J, Lin MH, Crosby SD, et al. (2008) Notch-deficient skin induces a lethal systemic B-lymphoproliferative disorder by secreting TSLP, a sentinel for epidermal integrity. *PLoS Biol* 6(5): e123 doi:10.1371/journal.pbio.0060123

Reference 29 was listed incorrectly. The corrected reference is:

29. Astrakhan A, Omori M, Nguyen T, Becker-Herman S, Iseki M, et al. (2007) Local increase in thymic stromal lymphopoietin induces systemic alterations in B cell development. *Nat Immunol* 8: 522-531.

Citation: Demehri S, Liu Z, Lee J, Lin MH, Crosby SD, et al. (2008) Correction: Notch-Deficient Skin Induces a Lethal Systemic B-Lymphoproliferative Disorder by Secreting TSLP, a Sentinel for Epidermal Integrity. *PLoS Biol* 6(7): e169. doi:10.1371/journal.pbio.0060169

Received: May 30, 2008; Accepted: May 30, 2008; Published: July 29, 2008

Copyright: © 2008 Demehri et al. This is an open-access article distributed under the terms of the Creative Commons Attribution License, which permits unrestricted use, distribution, and reproduction in any medium, provided the original author and source are credited.
